# Supplementary material for: A robust duplex Cu/PDMS-coated mesh with superhydrophobic surface for applications in cleaning of spilled oil
Source: Royal Society of Chemistry journal article supplement (doi:10.1039/c7ra00150a), 2017-01-01
Supplement: c7ra00150a1.pdf [file c7ra00150a1.pdf]

## Supporting Information

### **A robust duplex Cu/PDMS coated mesh with superhydrophobicity surface for cleaning of spilled oil applications**

Jingfang Zhu, Bin Liu \*

*School of Materials Science and Engineering, North University of China, Taiyuan, 030051,*

*People's Republic of China*

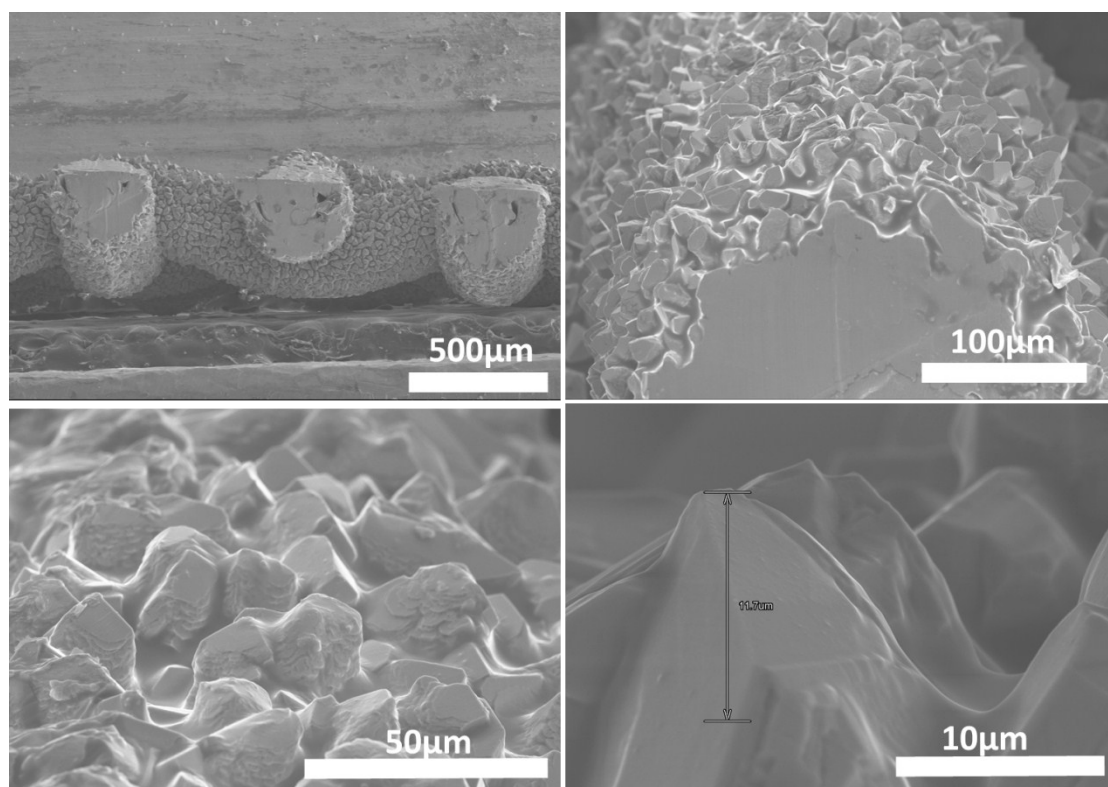

**Figure S1.** Cross section morphologies of the Mesh/Cu/PDMS coated

\*Corresponding author. Tel: +86- 0351-3557423.  
E-mail address: [liubin3y@nuc.edu.cn](mailto:liubin3y@nuc.edu.cn).

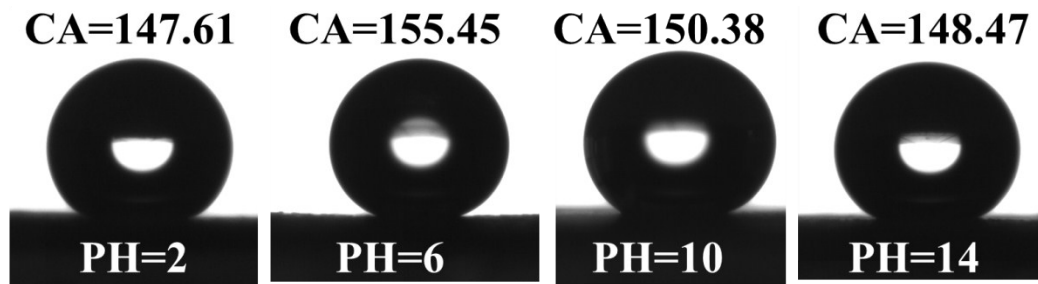

**Figure S2.** The contact angle of the Mesh/Cu/PDMS coated after immersion in different PH solutions for 3 days.

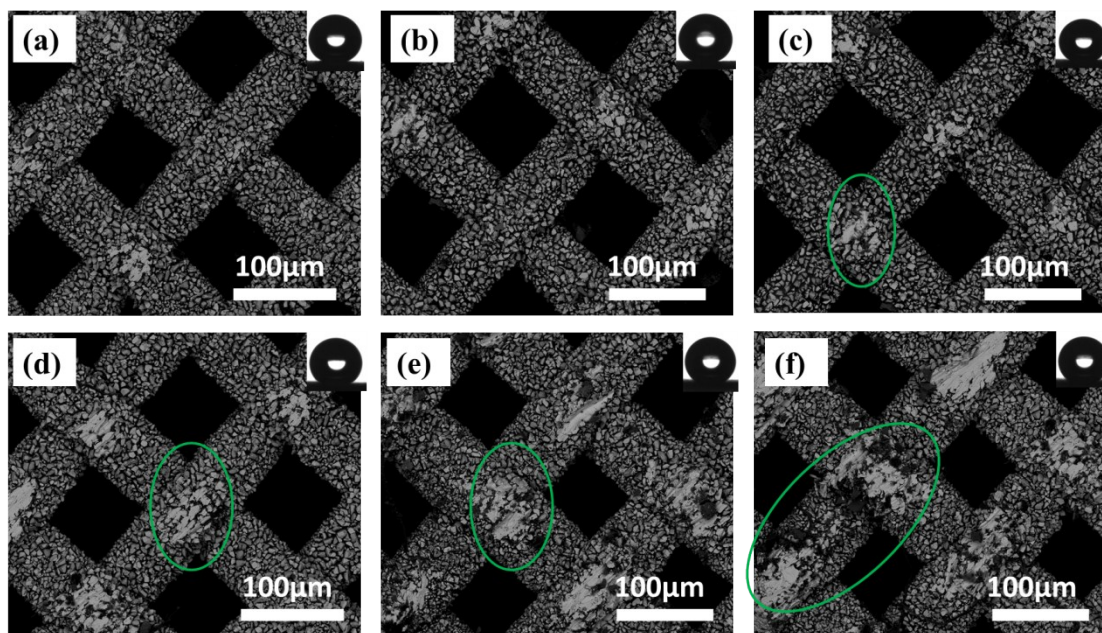

**Figure S3.** The SEM images and contact angles of the Mesh/Cu/PDMS coated after sandpaper abrasion cycles every abrasion test.

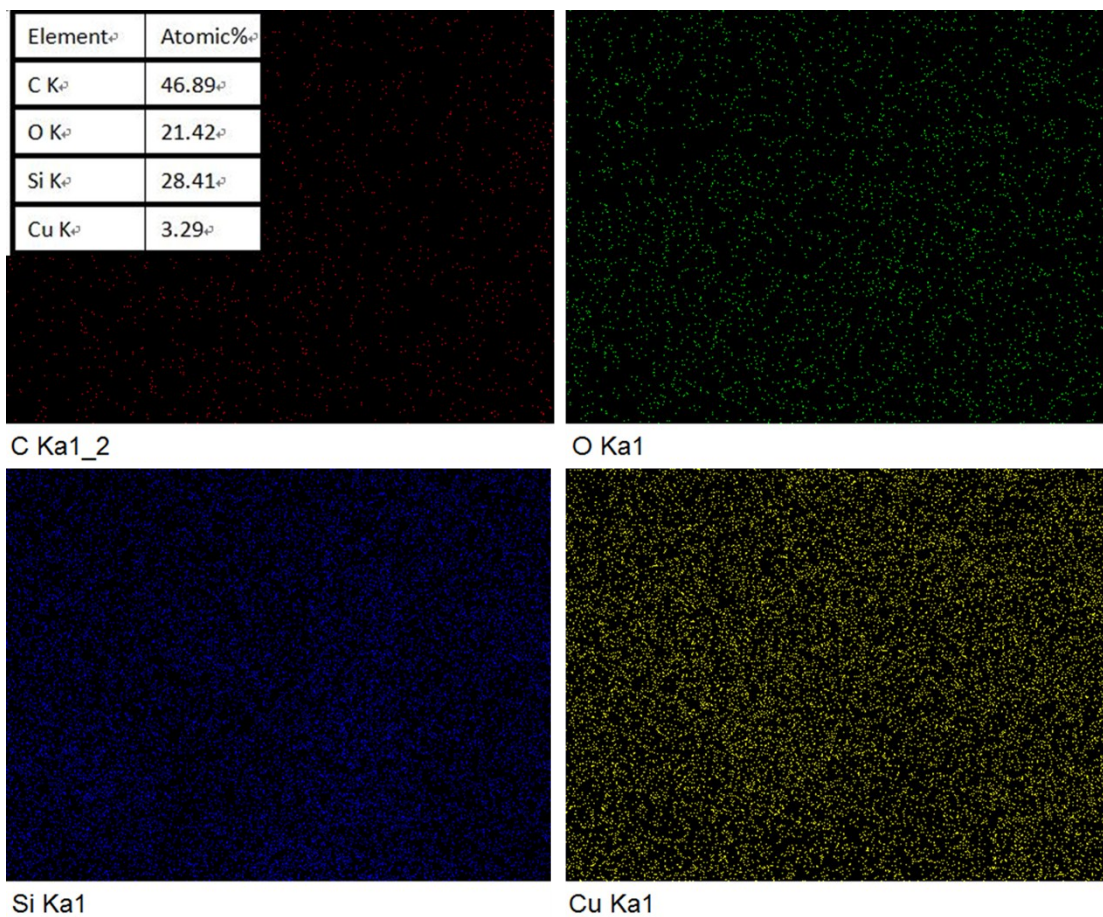

**Figure S4.** Chemical element mapping images of Mesh/Cu/PDMS film.

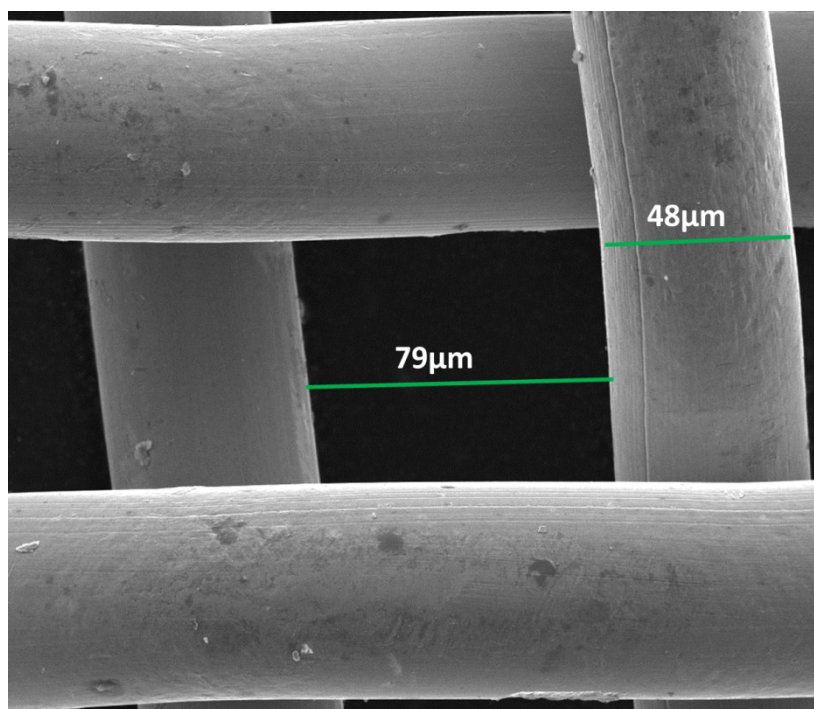

**Figure S5.** SEM images of uncoated.

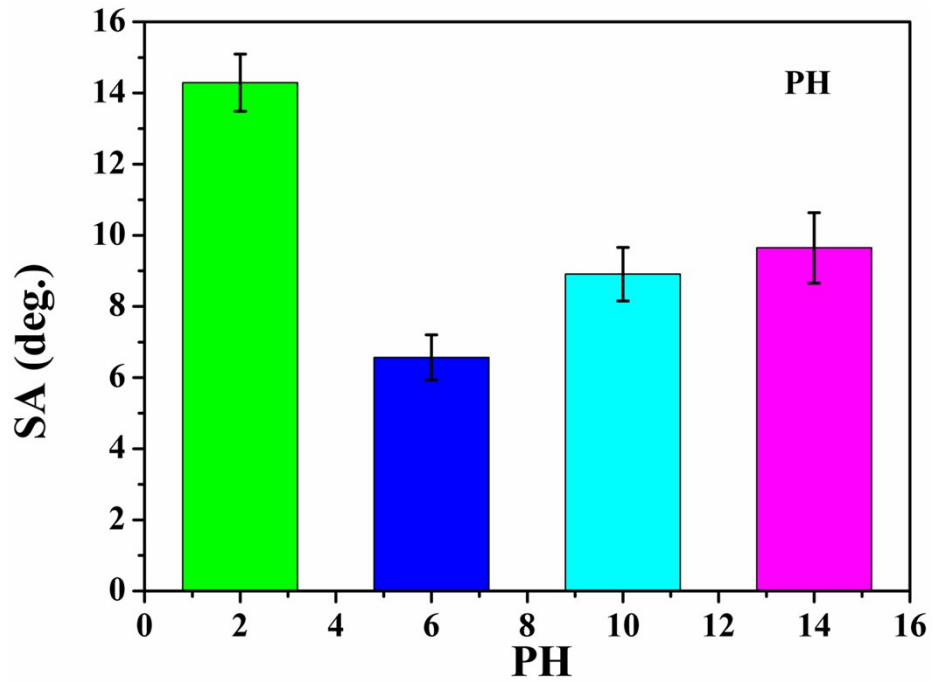

**Figure S6.** The SAs of the Mesh/Cu/PDMS coated after immersion in different PH solutions for 3 days
